# Supplementary material
Source: bioRxiv or medRxiv preprint supplement (https://www.biorxiv.org/highwire/filestream/84338/field_highwire_adjunct_files/0/274563-1.pdf)
Supplement: Supplementary file [file 274563-1.pdf]

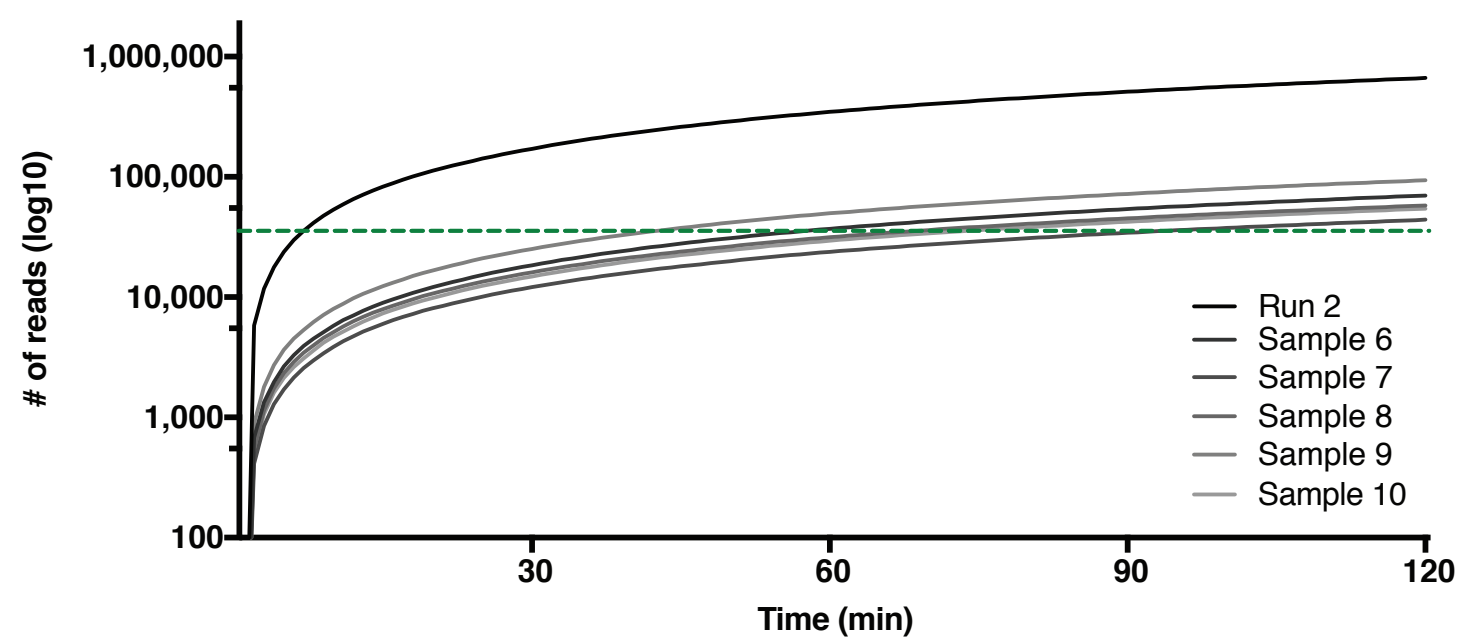

Supplementary Figure 1: MinION nanopore sequencing representative yield performance (Grayscales: sample 1-5; black: run 2 accumulative; Green dotted line: threshold for  $\geq 30K$  uniquelyaligned reads for downstream analysis).

A

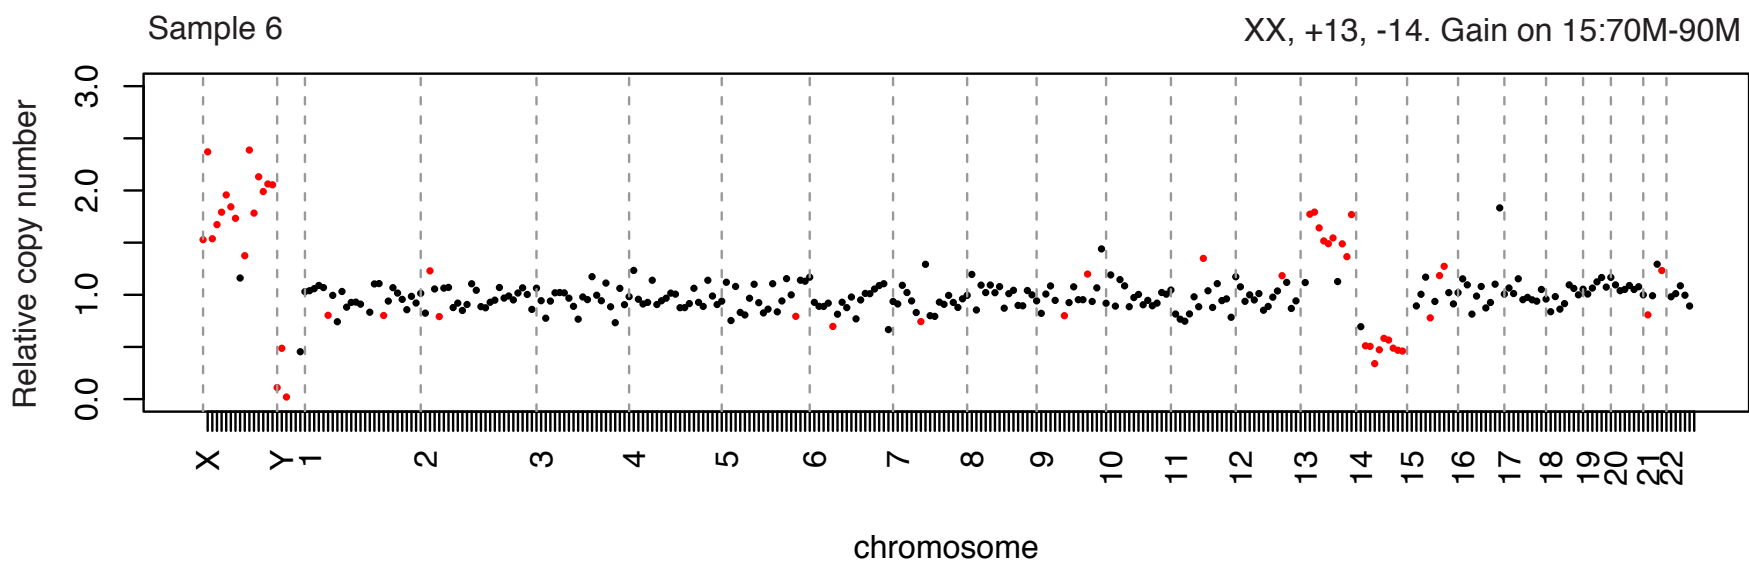

B

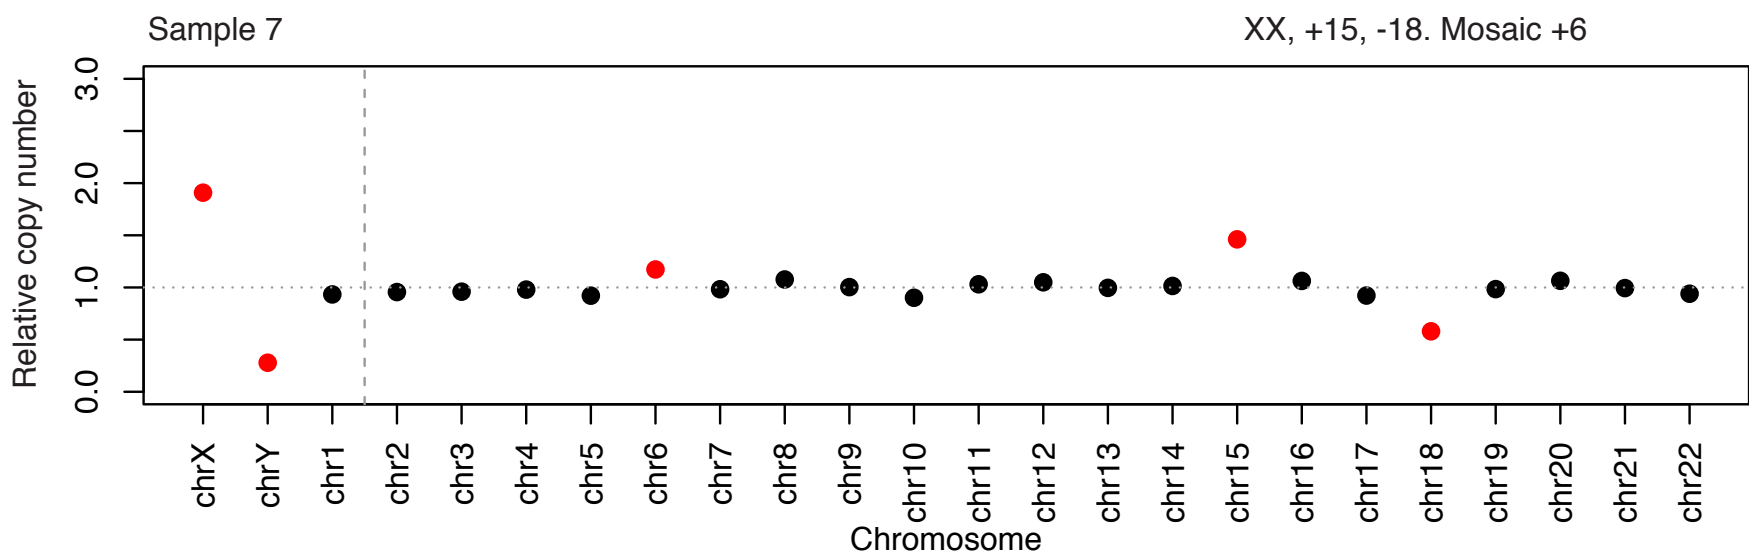

Supple. Figure 2: MinION large CNV and mosaic aneuploidy detection. A). Large CNV detection using 10Mbs bins. The abnormality of each chromosomal segment was indicated by color (red: abnormal; black: normal). B). Mosaic aneuploidy detection. The abnormality of each chromosome was indicated by color (red: abnormal; black: normal).
